# Supplementary material
Source: PubMed Central journal article supplement (PMC4625661)
Supplement: ASN.2014050469_ASN2014050469SupplementaryData.pdf [file ASN.2014050469_ASN2014050469SupplementaryData.pdf]

**Supplemental Table 1. Histology Diagnoses, proposed histology categories, HIV status, number of risk alleles and *APOL1* genotypes**

|    | Study IDs. | Diagnosis | HIV status | Proposed categories | rs71785313 | rs60910145 | rs73885319 | No. of risk alleles | Genotypes |
|----|------------|-----------|------------|---------------------|------------|------------|------------|---------------------|-----------|
| 1  | HIVAN      | HIVAN     | Positive   | HIVAN               | DI         | GT         | AG         | 2                   | G1/G2     |
| 2  | HIVAN      | HIVAN     | Positive   | HIVAN               | II         | GG         | GG         | 2                   | G1/G1     |
| 3  | HIVAN      | HIVAN     | Positive   | HIVAN               | DI         | GT         | AG         | 2                   | G1/G2     |
| 4  | HIVAN      | HIVAN     | Positive   | HIVAN               | II         | TT         | AG         | 1                   | G0/G1a    |
| 5  | HIVAN      | HIVAN     | Positive   | HIVAN               | II         | GG         | GG         | 2                   | G1/G1     |
| 6  | HIVAN      | HIVAN     | Positive   | HIVAN               | DI         | GT         | AG         | 2                   | G1/G2     |
| 7  | HIVAN      | HIVAN     | Positive   | HIVAN               | II         | GG         | GG         | 2                   | G1/G1     |
| 8  | HIVAN      | HIVAN     | Positive   | HIVAN               | II         | GT         | AG         | 1                   | G0/G1     |
| 9  | HIVAN      | HIVAN     | Positive   | HIVAN               | DI         | GT         | AG         | 2                   | G1/G2     |
| 10 | HIVAN      | HIVAN     | Positive   | HIVAN               | DI         | GT         | AG         | 2                   | G1/G2     |
| 11 | HIVAN      | HIVAN     | Positive   | HIVAN               | DI         | GT         | AG         | 2                   | G1/G2     |
| 12 | HIVAN      | HIVAN     | Positive   | HIVAN               | II         | GG         | GG         | 2                   | G1/G1     |
| 13 | HIVAN      | HIVAN     | Positive   | HIVAN               | DI         | TT         | AA         | 1                   | G0/G2     |
| 14 | HIVAN      | HIVAN     | Positive   | HIVAN               | II         | GT         | AG         | 1                   | G0/G1     |
| 15 | HIVAN      | HIVAN     | Positive   | HIVAN               | DD         | TT         | AA         | 2                   | G2/G2     |
| 16 | HIVAN      | HIVAN     | Positive   | HIVAN               | II         | GG         | GG         | 2                   | G1/G1     |
| 17 | HIVAN      | HIVAN     | Positive   | HIVAN               | DI         | GT         | AG         | 2                   | G1/G2     |
| 18 | HIVAN      | HIVAN     | Positive   | HIVAN               | DI         | GT         | AG         | 2                   | G1/G2     |
| 19 | HIVAN      | HIVAN     | Positive   | HIVAN               | DI         | GT         | AG         | 2                   | G1/G2     |
| 20 | HIVAN      | HIVAN     | Positive   | HIVAN               | DI         | GT         | AG         | 2                   | G1/G2     |

|    |             |                 |          |        |    |    |    |    |        |
|----|-------------|-----------------|----------|--------|----|----|----|----|--------|
| 21 | HIVAN       | HIVAN           | Positive | HIVAN  | DI | GT | AG | 2  | G1/G2  |
| 22 | HIVAN       | HIVAN           | Positive | HIVAN  | II | GG | GG | 2  | G1/G1  |
| 23 | HIVAN       | HIVAN           | Positive | HIVAN  | II | TT | AA | 0  | G0/G0  |
| 24 | HIVAN       | HIVAN           | Positive | HIVAN  | II | GT | AG | 1  | G0/G1  |
| 25 | HIVAN       | HIVAN           | Positive | HIVAN  | DI | GT | AG | 2  | G1/G2  |
| 26 | HIVAN       | HIVAN           | Positive | HIVAN  | DI | GT | AG | 2  | G1/G2  |
| 27 | HIVAN       | HIVAN           | Positive | HIVAN  | II | GG | GG | 2  | G1/G1  |
| 28 | HIVAN       | HIVAN           | Positive | HIVAN  | II | GT | GG | 2  | G1/G1a |
| 29 | HIVAN       | HIVAN           | Positive | HIVAN  | II | TT | AA | 0  | G0/G0  |
| 30 | HIVAN       | HIVAN           | Positive | HIVAN  | DD | TT | AA | 2  | G2/G2  |
| 31 | HIVAN       | HIVAN           | Positive | HIVAN  | II | GT | AG | 1  | G0/G1  |
| 32 | HIVAN       | HIVAN           | Positive | HIVAN  | DI | GT | AG | 2  | G1/G2  |
| 33 | HIVAN       | HIVAN           | Positive | HIVAN  | NA | GT | AG | NA | NA     |
| 34 | HIVAN       | HIVAN           | Positive | HIVAN  | DI | TT | AG | 2  | G1a/G2 |
| 35 | HIVAN       | HIVAN           | Positive | HIVAN  | DI | GT | AG | 2  | G1/G2  |
| 36 | HIVAN       | HIVAN           | Positive | HIVAN  | DI | GT | AG | 2  | G1/G2  |
| 37 | HIVAN       | HIVAN           | Positive | HIVAN  | DI | GT | AG | 2  | G1/G2  |
| 38 | HIVAN       | HIVAN           | Positive | HIVAN  | DI | GT | AG | 2  | G1/G2  |
| 39 | HIVAN       | HIVAN           | Positive | HIVAN  | DD | TT | AA | 2  | G2/G2  |
| 1  | HIV (+) CKD | FSGS            | Positive | FSGS   | II | TT | AA | 0  | G0/G0  |
| 2  | HIV (+) CKD | IgA Nephropathy | Positive | HIVICK | II | GG | AG | 2  | G1/G1b |
| 3  | HIV (+) CKD | FSGS            | Positive | FSGS   | DD | TT | AA | 2  | G2/G2  |

|    |             |                                                                |          |                  |    |    |    |   |       |
|----|-------------|----------------------------------------------------------------|----------|------------------|----|----|----|---|-------|
| 4  | HIV (+) CKD | FSGS                                                           | Positive | FSGS             | II | GT | AG | 1 | G0/G1 |
| 5  | HIV (+) CKD | FSGS                                                           | Positive | FSGS             | II | TT | AA | 0 | G0/G0 |
| 6  | HIV (+) CKD | HIVICK                                                         | Positive | HIVICK           | DI | GT | AG | 2 | G1/G2 |
| 7  | HIV (+) CKD | Minimal Change disease                                         | Positive | Other kidney dis | II | TT | AA | 0 | G0/G0 |
| 8  | HIV (+) CKD | Membranoproliferative glomerulonephritis c/w C3 glomerulopathy | Positive | Other GN         | II | TT | AA | 0 | G0/G0 |
| 9  | HIV (+) CKD | HIVICK                                                         | Positive | HIVICK           | II | TT | AA | 0 | G0/G0 |
| 10 | HIV (+) CKD | Membranoproliferative glomerulonephritis                       | Positive | Other GN         | II | GT | AG | 1 | G0/G1 |
| 11 | HIV (+) CKD | HIVICK                                                         | Positive | HIVICK           | DI | TT | AA | 1 | G0/G2 |
| 12 | HIV (+) CKD | Benign nephrosclerosis                                         | Positive | Other kidney dis | DD | TT | AA | 2 | G2/G2 |
| 13 | HIV (+) CKD | Membranous glomerulonephritis                                  | Positive | Other GN         | II | TT | AA | 0 | G0/G0 |
| 14 | HIV (+) CKD | Global glomerulosclerosis with ischemic changes c/w ANS        | Positive | Other kidney dis | II | GG | GG | 2 | G1/G1 |
| 15 | HIV (+) CKD | FSGS                                                           | Positive | FSGS             | DI | TT | AA | 1 | G0/G2 |
| 16 | HIV (+) CKD | FSGS                                                           | Positive | FSGS             | II | TT | AA | 0 | G0/G0 |
| 17 | HIV (+) CKD | HIVICK                                                         | Positive | HIVICK           | DI | GT | AG | 2 | G1/G2 |
| 18 | HIV (+) CKD | HIVICK                                                         | Positive | HIVICK           | II | TT | AA | 0 | G0/G0 |
| 19 | HIV (+) CKD | Membranous glomerulonephritis                                  | Positive | Other GN         | II | TT | AA | 0 | G0/G0 |
| 20 | HIV (+) CKD | HIVICK                                                         | Positive | HIVICK           | DI | TT | AA | 1 | G0/G2 |
| 21 | HIV (+) CKD | Membranous glomerulonephritis                                  | Positive | Other GN         | II | TT | AA | 0 | G0/G0 |
| 22 | HIV (+) CKD | Membranous glomerulonephritis                                  | Positive | Other GN         | DI | TT | AA | 1 | G0/G2 |
| 23 | HIV (+) CKD | HIVICK                                                         | Positive | HIVICK           | II | GT | AG | 1 | G0/G1 |
| 24 | HIV (+) CKD | FSGS                                                           | Positive | FSGS             | II | TT | AA | 0 | G0/G0 |
| 25 | HIV (+) CKD | FSGS                                                           | Positive | FSGS             | DI | TT | AA | 1 | G0/G2 |

|    |             |                                          |          |                  |    |    |    |    |       |
|----|-------------|------------------------------------------|----------|------------------|----|----|----|----|-------|
| 26 | HIV (+) CKD | FSGS                                     | Positive | FSGS             | II | TT | AA | 0  | G0/G0 |
| 27 | HIV (+) CKD | HIVICK                                   | Positive | HIVICK           | DI | TT | NA | NA | NA    |
| 28 | HIV (+) CKD | HIVICK                                   | Positive | HIVICK           | II | TT | AA | 0  | G0/G0 |
| 29 | HIV (+) CKD | FSGS                                     | Positive | FSGS             | II | TT | AA | 0  | G0/G0 |
| 30 | HIV (+) CKD | HIVICK                                   | Positive | HIVICK           | II | TT | AA | 0  | G0/G0 |
| 31 | HIV (+) CKD | Membranous glomerulonephritis            | Positive | Other GN         | II | GT | AG | 1  | G0/G1 |
| 32 | HIV (+) CKD | Membranous glomerulonephritis            | Positive | Other GN         | II | TT | AA | 0  | G0/G0 |
| 33 | HIV (+) CKD | FSGS                                     | Positive | FSGS             | II | TT | AA | 0  | G0/G0 |
| 34 | HIV (+) CKD | FSGS                                     | Positive | FSGS             | II | TT | AA | 0  | G0/G0 |
| 35 | HIV (+) CKD | Membranous glomerulonephritis            | Positive | Other GN         | II | TT | AA | 0  | G0/G0 |
| 36 | HIV (+) CKD | FSGS                                     | Positive | FSGS             | II | TT | AA | 0  | G0/G0 |
| 37 | HIV (+) CKD | Thrombotic microangiopathy               | Positive | Other kidney dis | II | TT | AA | 0  | G0/G0 |
| 38 | HIV (+) CKD | Membranous glomerulonephritis            | Positive | Other GN         | II | TT | AA | 0  | G0/G0 |
| 39 | HIV (+) CKD | Global glomerulosclerosis-low grade IgAN | Positive | HIVICK           | DI | TT | AA | 1  | G0/G2 |
| 40 | HIV (+) CKD | HIVICK                                   | Positive | HIVICK           | DI | TT | AA | 1  | G0/G2 |
| 1  | HIV (-) CKD | IgA Nephropathy                          | Neg      | Other GN         | II | TT | AA | 0  | G0/G0 |
| 2  | HIV (-) CKD | Membranous glomerulonephritis            | Neg      | Other GN         | DI | TT | AA | 1  | G0/G2 |
| 3  | HIV (-) CKD | FSGS                                     | Neg      | FSGS             | DI | TT | AA | 1  | G0/G2 |
| 4  | HIV (-) CKD | Nodular Glomerulosclerosis               | Neg      | Other kidney dis | II | TT | AA | 0  | G0/G0 |
| 5  | HIV (-) CKD | Lupus nephritis                          | Neg      | Other GN         | II | TT | AA | 0  | G0/G0 |
| 6  | HIV (-) CKD | Global glomerulosclerosis                | Neg      | Other kidney dis | II | TT | AA | 0  | G0/G0 |
| 7  | HIV (-) CKD | Lupus nephritis                          | Neg      | Other GN         | II | TT | AA | 0  | G0/G0 |

|    |             |                                                    |     |                  |    |    |    |    |        |
|----|-------------|----------------------------------------------------|-----|------------------|----|----|----|----|--------|
| 8  | HIV (-) CKD | FSGS                                               | Neg | FSGS             | DI | TT | AG | 2  | G1a/G2 |
| 9  | HIV (-) CKD | Membranous glomerulonephritis                      | Neg | Other GN         | II | TT | AA | 0  | G0/G0  |
| 10 | HIV (-) CKD | Membranoproliferative glomerulonephritis           | Neg | Other GN         | DI | TT | AA | 1  | G0/G2  |
| 11 | HIV (-) CKD | Membranous glomerulonephritis                      | Neg | Other GN         | II | TT | AA | 0  | G0/G0  |
| 12 | HIV (-) CKD | Membranous glomerulonephritis                      | Neg | Other GN         | II | GT | AG | 1  | G0/G1  |
| 13 | HIV (-) CKD | Lupus nephritis                                    | Neg | Other GN         | II | GT | AG | 1  | G0/G1  |
| 14 | HIV (-) CKD | Benign nephrosclerosis                             | Neg | Other kidney dis | II | TT | AA | 0  | G0/G0  |
| 15 | HIV (-) CKD | Minimal change disease                             | Neg | Other kidney dis | II | TT | AA | 0  | G0/G0  |
| 16 | HIV (-) CKD | Proliferative glomerulonephropathy                 | Neg | Other GN         | II | TT | NA | NA | NA     |
| 17 | HIV (-) CKD | FSGS                                               | Neg | FSGS             | II | TT | AA | 0  | G0/G0  |
| 18 | HIV (-) CKD | Membranous glomerulonephritis                      | Neg | Other GN         | NA | NA | NA | NA | NA     |
| 19 | HIV (-) CKD | Minimal change disease                             | Neg | Other kidney dis | II | TT | AA | 0  | G0/G0  |
| 20 | HIV (-) CKD | Global glomerulosclerosis                          | Neg | Other kidney dis | II | GT | AG | 1  | G0/G1  |
| 21 | HIV (-) CKD | Membranous glomerulonephritis                      | Neg | Other GN         | II | GT | AG | 1  | G0/G1  |
| 22 | HIV (-) CKD | FSGS                                               | Neg | FSGS             | II | TT | AA | 0  | G0/G0  |
| 23 | HIV (-) CKD | Thrombotic microangiopathy                         | Neg | Other kidney dis | II | TT | AA | 0  | G0/G0  |
| 24 | HIV (-) CKD | FSGS                                               | Neg | FSGS             | DI | TT | AA | 1  | G0/G2  |
| 25 | HIV (-) CKD | Minimal change disease                             | Neg | Other kidney dis | DI | TT | AA | 1  | G0/G2  |
| 26 | HIV (-) CKD | Membranous glomerulonephritis                      | Neg | Other GN         | II | TT | AA | 0  | G0/G0  |
| 27 | HIV (-) CKD | Severe ANS with secondary FSGS                     | Neg | Other kidney dis | II | TT | AA | 0  | G0/G0  |
| 28 | HIV (-) CKD | Extensive GS, hilar SS could be Oxalate (Oxalosis) | Neg | Other kidney dis | II | TT | AA | 0  | G0/G0  |
| 29 | HIV (-) CKD | Minimal change disease                             | Neg | Other kidney dis | II | TT | AA | 0  | G0/G0  |

|    |             |                                          |     |                  |    |    |    |   |        |
|----|-------------|------------------------------------------|-----|------------------|----|----|----|---|--------|
| 30 | HIV (-) CKD | FSGS                                     | Neg | FSGS             | II | TT | AA | 0 | G0/G0  |
| 31 | HIV (-) CKD | Membranous glomerulonephritis            | Neg | Other GN         | DI | TT | AA | 1 | G0/G2  |
| 32 | HIV (-) CKD | Membranous glomerulonephritis            | Neg | Other GN         | II | TT | AA | 0 | G0/G0  |
| 33 | HIV (-) CKD | FSGS                                     | Neg | FSGS             | II | TT | AG | 1 | G0/G1a |
| 34 | HIV (-) CKD | Minimal change disease                   | Neg | Other kidney dis | II | TT | AA | 0 | G0/G0  |
| 35 | HIV (-) CKD | Membranous glomerulonephritis            | Neg | Other GN         | II | TT | AA | 0 | G0/G0  |
| 36 | HIV (-) CKD | Thrombotic microangiopathy               | Neg | Other kidney dis | DI | TT | AA | 1 | G0/G2  |
| 37 | HIV (-) CKD | Membranous glomerulonephritis            | Neg | Other GN         | II | GT | AG | 1 | G0/G1  |
| 38 | HIV (-) CKD | FSGS                                     | Neg | FSGS             | II | TT | AA | 0 | G0/G0  |
| 39 | HIV (-) CKD | Membranoproliferative glomerulonephritis | Neg | Other GN         | II | TT | AA | 0 | G0/G0  |
| 40 | HIV (-) CKD | FSGS                                     | Neg | FSGS             | II | TT | AA | 0 | G0/G0  |
| 41 | HIV (-) CKD | Membranous glomerulonephritis            | Neg | Other GN         | II | TT | AA | 0 | G0/G0  |

Other kidney dis: Other kidney disease; Other GN: Other glomerulonephritis; Neg: Negative; c/w: consistent with. Those highlighted in yellow failed genotyping and are not included in Tables 2 and 3.

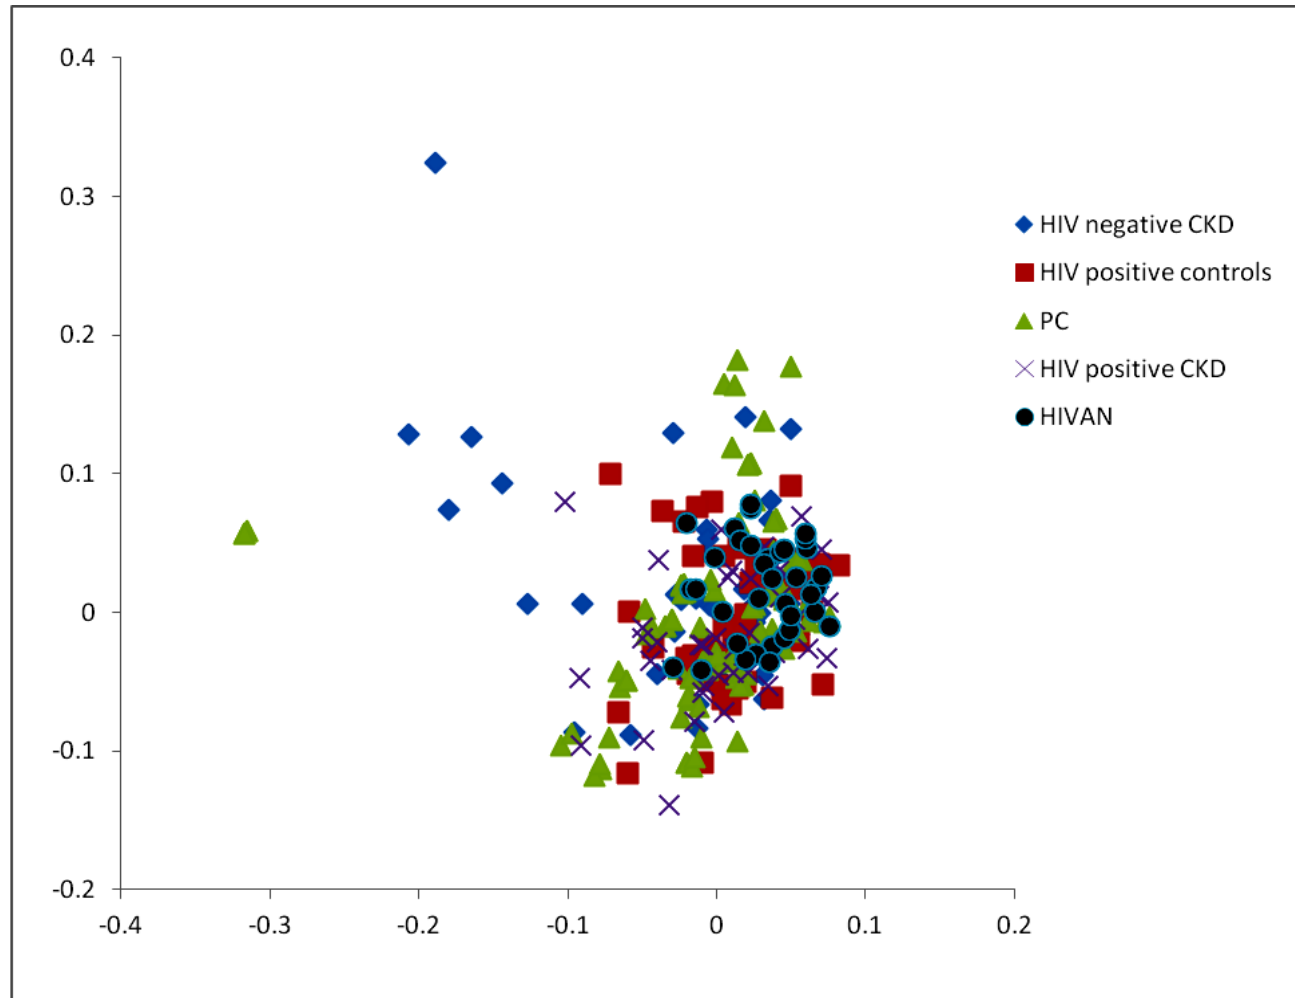

**Supplemental Figure 1.** Principal component analysis of all study participants along the top two eigen values. The distribution of HIVAN cases and HIV (+) control groups was not significantly different along the top two eigen axes ( $P > 0.05$ ) suggesting that the high association observed is not due to an undetected population substructure. PC (Population Controls). HIVAN (HIV-associated Nephropathy). CKD (Chronic kidney Disease).
